# Supplementary material
Source: publisher figshare collection journal article supplement (https://frontiersin.figshare.com/ndownloader/files/28809240)
Supplement: Supplementary file [file 28809240]

# Cyclotides isolated from *Allexis* species of Cameroon are inhibitors of human prolyl oligopeptidase

Jasmin Gattringer,<sup>#</sup> Olivier Eteme N'Dogo,<sup>#</sup> Bernhard Retzl, Carina Ebermann, Christian W. Gruber\* and Roland Hellinger

Medical University of Vienna, Center for Physiology and Pharmacology, Schwarzspanierstr. 17,  
1090 Vienna, Austria

<sup>#</sup> The authors contributed equally to the study.

\*Corresponding author: Christian W. Gruber, Tel.: +43-(0)1-40160-31390, Email:  
christian.w.gruber@meduniwien.ac.at

## Supplementary File

## TABLE OF SUPPLEMENTARY DATA

|                                                                                          |         |
|------------------------------------------------------------------------------------------|---------|
| Supplementary Figures S1-S9.....                                                         | S3      |
| Table S1. Peptidomic analysis of <i>Allexis batangae</i> peptide enriched extracts.....  | S13     |
| Table S2. Peptidomic analysis of <i>Allexis obanensis</i> peptide enriched extracts..... | S13     |
| Table S3. Peptidomic analysis of <i>Allexis zygomorpha</i> peptide enriched extract..... | S14     |
| Table S4. High sensitivity amino acid analysis of alca 1 .....                           | S15     |
| Table S5. High sensitivity amino acid analysis of alca 2 .....                           | S15     |
| <br>Supplementary Data S1: Sequence alignment of cyclotides to alca 1 and alca 2 .....   | <br>S16 |

## SUPPLEMENTARY FIGURES

**Supplementary Figure S1.** Analysis of peptide masses in Allexis species. MALDI-TOF-MS spectra of peptide enriched extracts of *A. batangae* (A), *A. obanensis* (C) and *A. zygomorpha* (E) were analysed in the  $m/z$  range of 2900-3550. The two major signals were retrospectively denoted as alca 1 ( $m/z$  3211.5) and alca 2 ( $m/z$  3084.2) in the spectra. Representative pictures of each plant species are shown as an insert. Analysis of the extracts using analytical HPLC at absorbance at 280 nm are shown for *A. batangae* (B), *A. obanensis* (D) and *A. zygomorpha* (F).

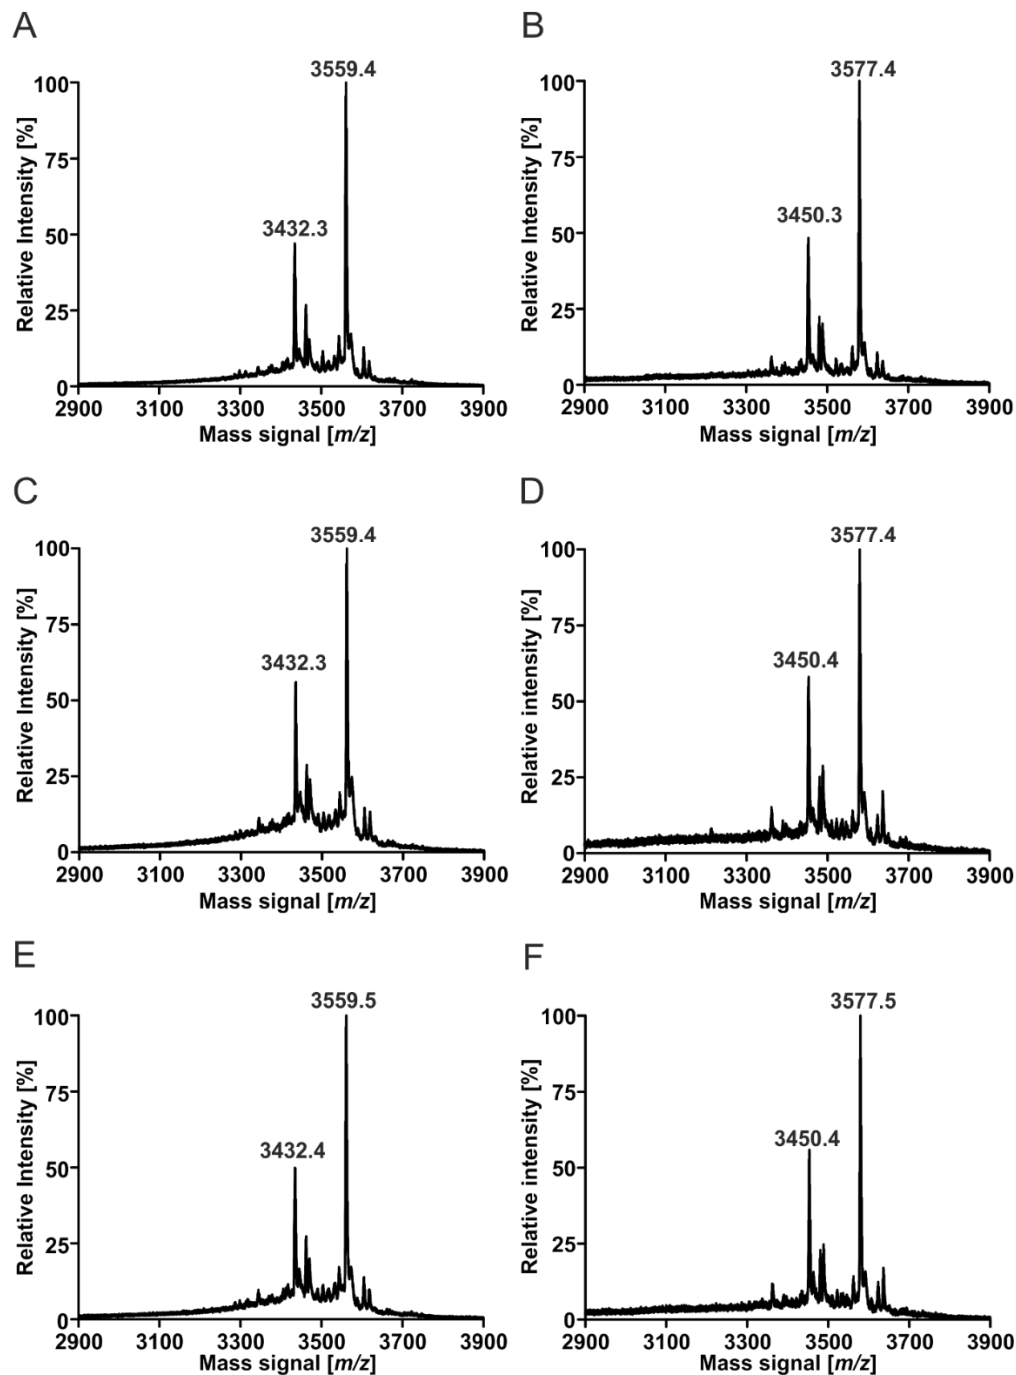

Supplementary Figure S2. Identification of cyclic cystine-rich peptides in *Allexis* species. Using a combined derivatization and site specific proteolysis strategy the number of cysteine moieties and the presence of a single conserved glutamic acid in the peptides of *A. batangae* (A, B), *A. obanensis* (C, D) and *A. zygomorpha* (F,G) were confirmed using MALDI-TOF-MS analysis of samples shown in the range of  $m/z$  2900-3900. Characteristic mass shifts compared to the native mass were observed, such as +1 Da as well as of +58 Da per reduced and acetamidated cysteine, respectively, and additional +18 Da for a single peptide bond hydrolysis of endoprotease GluC activity. The total mass shift of +366 Da compared to the native mass indicates the presence of cyclic cystine-rich peptides in the investigated plant species. The observed masses of the two major peaks are labelled in each spectrum.

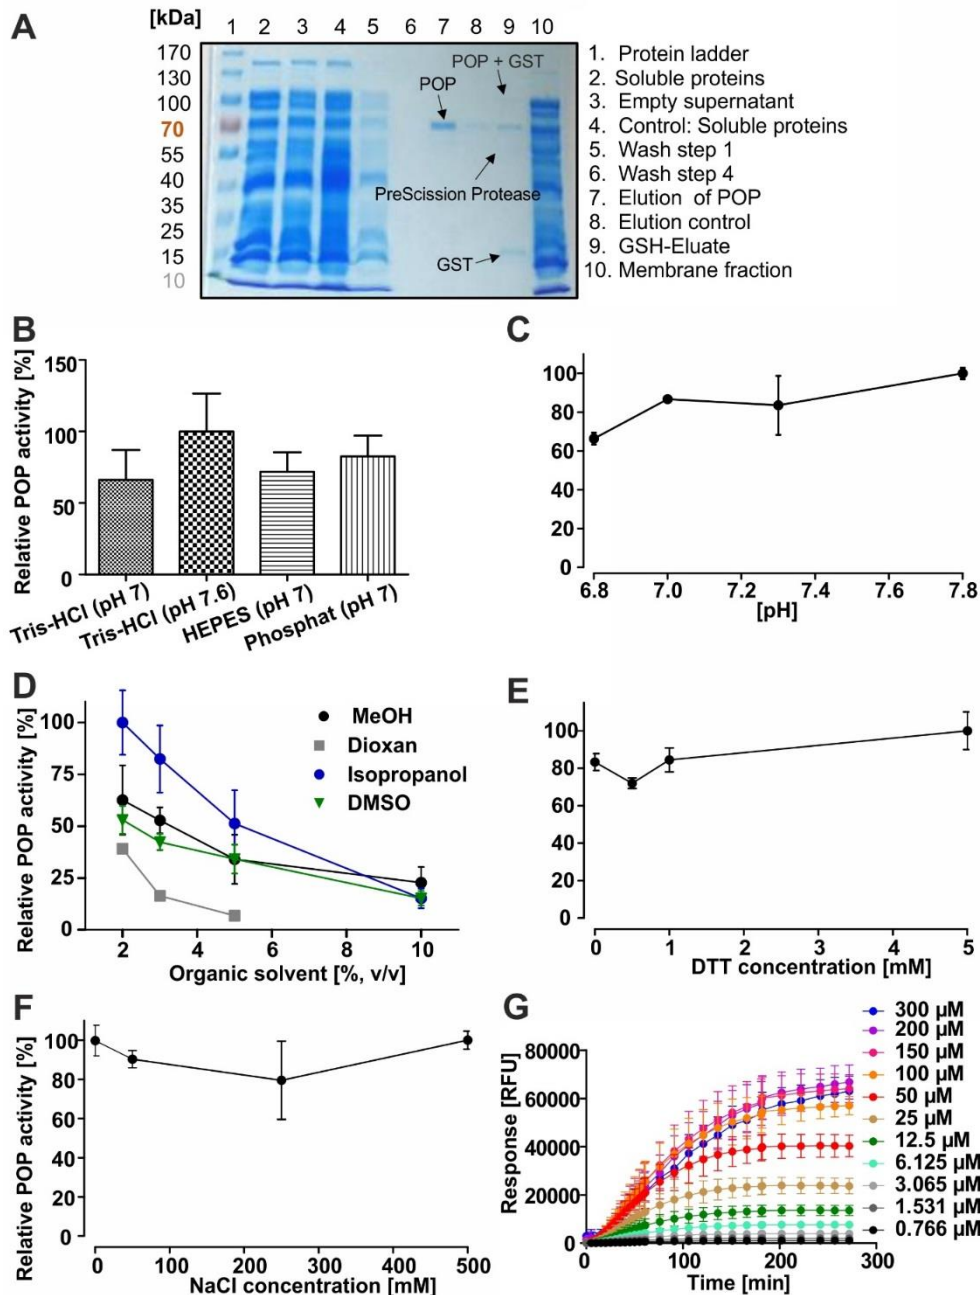

Supplementary Figure S3. POP purification and optimization of the assay system. Human POP was expressed in *E. coli* and purified as functional protease. The purification steps were analyzed using a Coomassie stained protein gel. Purified POP enzyme is shown in lane 7 after site-specific cleavage with PreScission protease and release of the untagged protein (A). Different assay conditions were tested to study the effect of buffer systems and pH dependency (B,C), the use of organic solvents (D), DTT (E) and NaCl (F) concentration on POP enzyme activity. For calculation of POP activity the slope in the linear range between 5 and 35 min of kinetic measurements were used. With the optimized conditions Z-Gly-Pro-amino-coumarin concentrations between 0.766  $\mu\text{M}$  and 300  $\mu\text{M}$  were tested in a kinetic measurement and a concentration dependent increase in signal was observed. Above 150  $\mu\text{M}$  substrate concentration no further increase in signal was measured due to precipitation of the substrate (G). All data are shown as mean of three biological experiments and error is shown as  $\pm\text{SEM}$ .

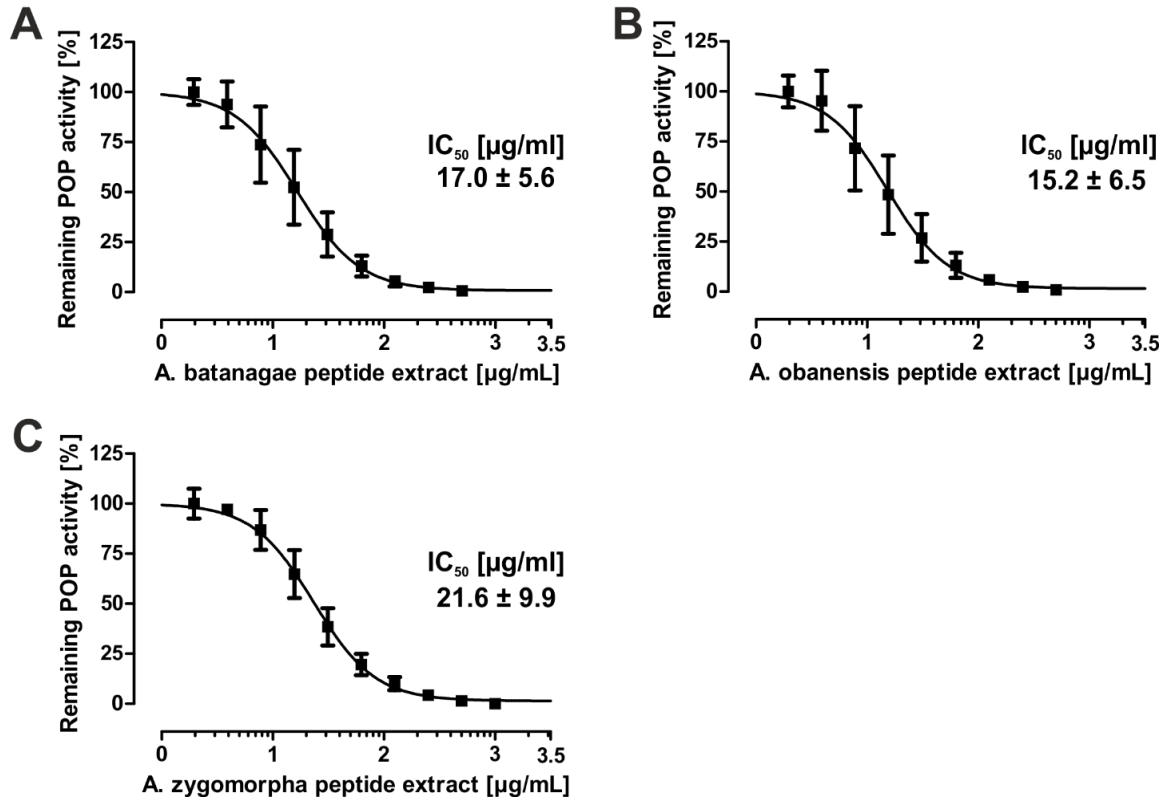

Supplementary Figure S4. POP inhibition of peptide enriched extracts of *A. batangae*, *A. obanensis* and *A. zygomorpha*. The inhibition activity of peptide enriched plant extracts toward human POP was evaluated in a dose response study applying 2-1000  $\mu\text{g/mL}$ . The dose-response curves with the obtained  $IC_{50}$  values of the three plant species *A. batangae* ( $IC_{50}$   $17.0 \pm 5.6$   $\mu\text{g/mL}$ ) (A), *A. obanensis* ( $IC_{50}$   $15.2 \pm 6.5$ ) (B) and *A. zygomorpha* ( $IC_{50}$   $21.6 \pm 9.9$   $\mu\text{g/mL}$ ) (C). All data are shown as  $n=6$  including mean  $\pm$  standard deviation.

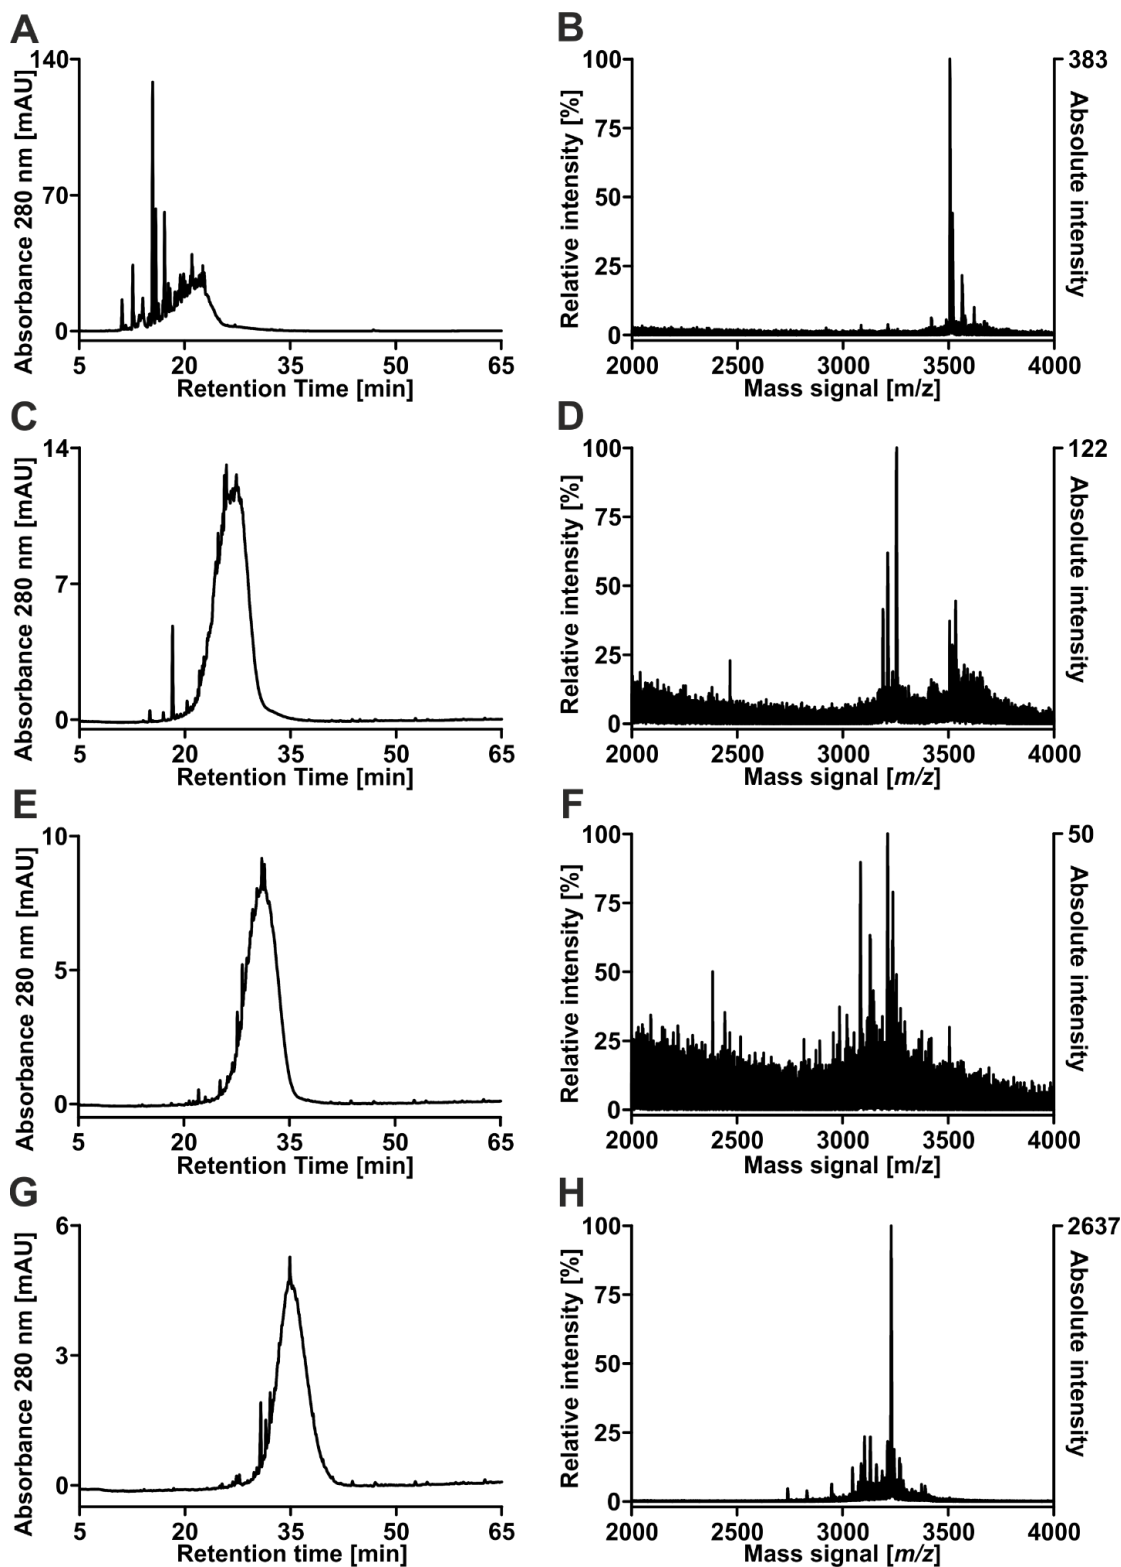

Supplementary Figure S5. QC of non-bioactive HPLC fractions. Analytical HPLC traces at 280 nm for non-bioactive fractions F2 (A), F3 (C), F4 (E) and F5 (G) and the corresponding MALDI-TOF-MS analysis in the range of  $m/z$  2000-4000 for fractions F2 (B), F3 (D), F4 (F) and F5 (H).

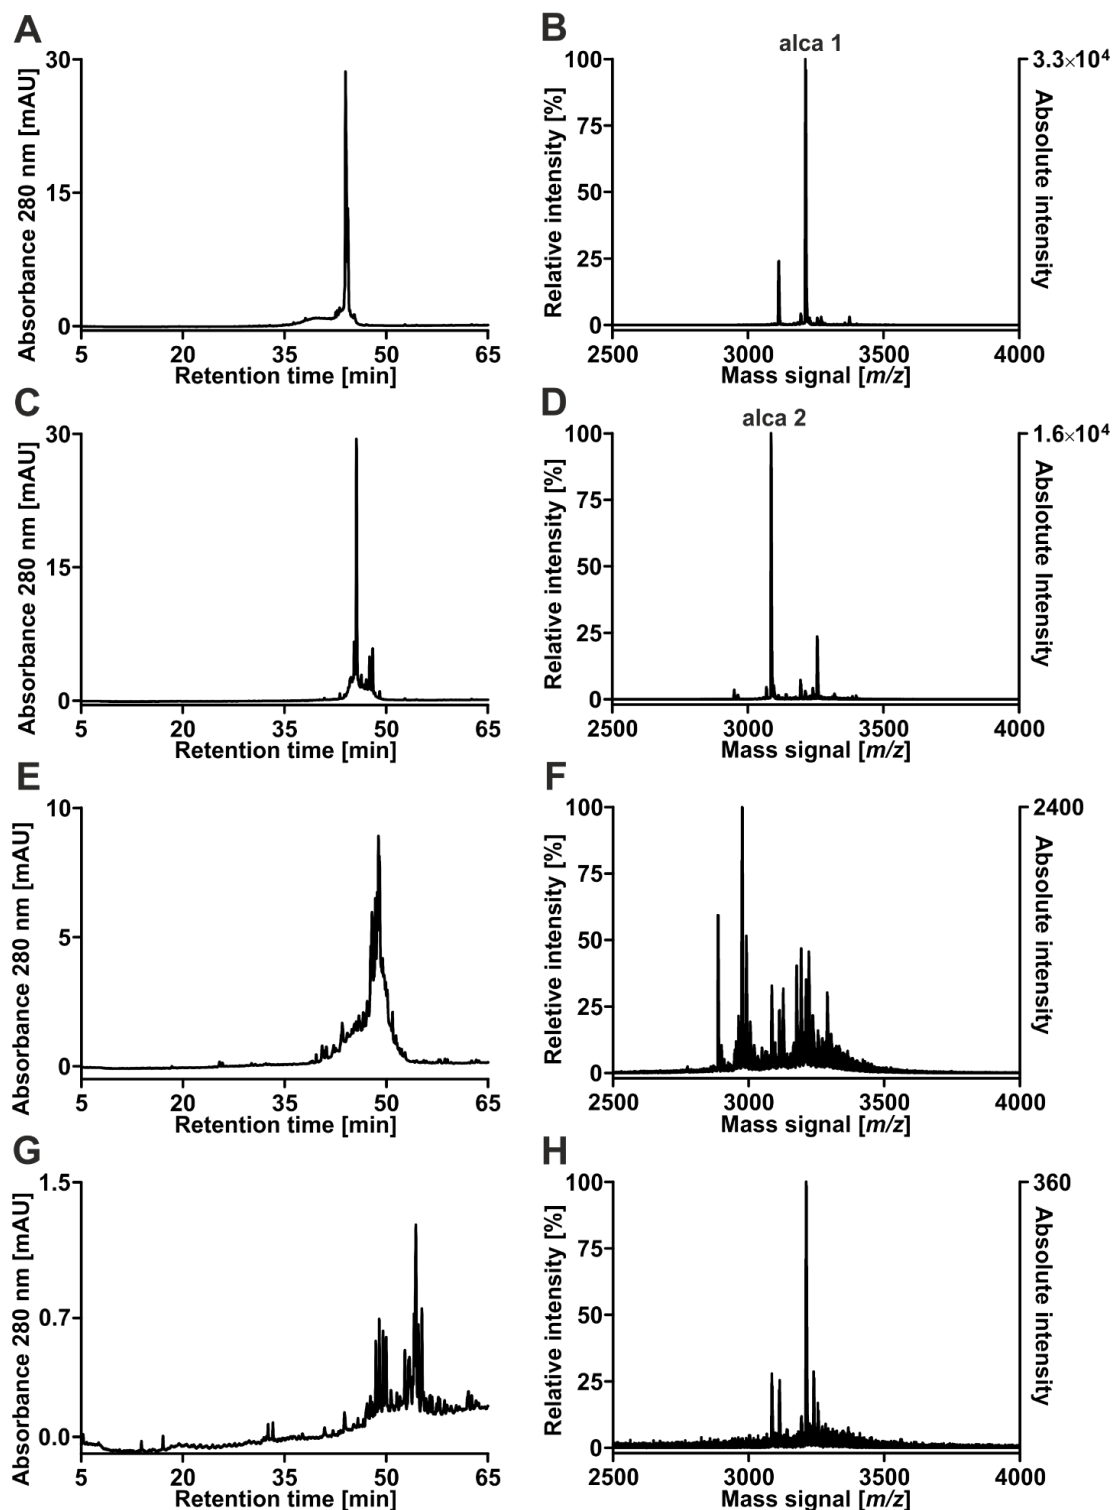

Supplementary Figure S6. The MALDI-MS and HPLC quality analysis are shown for the bioactive fractions derived from bioassay guided fraction. Analytical HPLC traces at 280 nm for bioactive fractions F6 (A), F7 (C), F8 (E) and F9 (G) and the corresponding MALDI-TOF-MS analysis in the range of m/z 2500-4000 for fractions F6 (B), F7 (D), F8 (F) and F9 (H). The two major peptides alca 1 (m/z 3211.5) and alca 2 (m/z 3084.2) identified in fractions F7 and F6 respectively were annotated in the spectra.



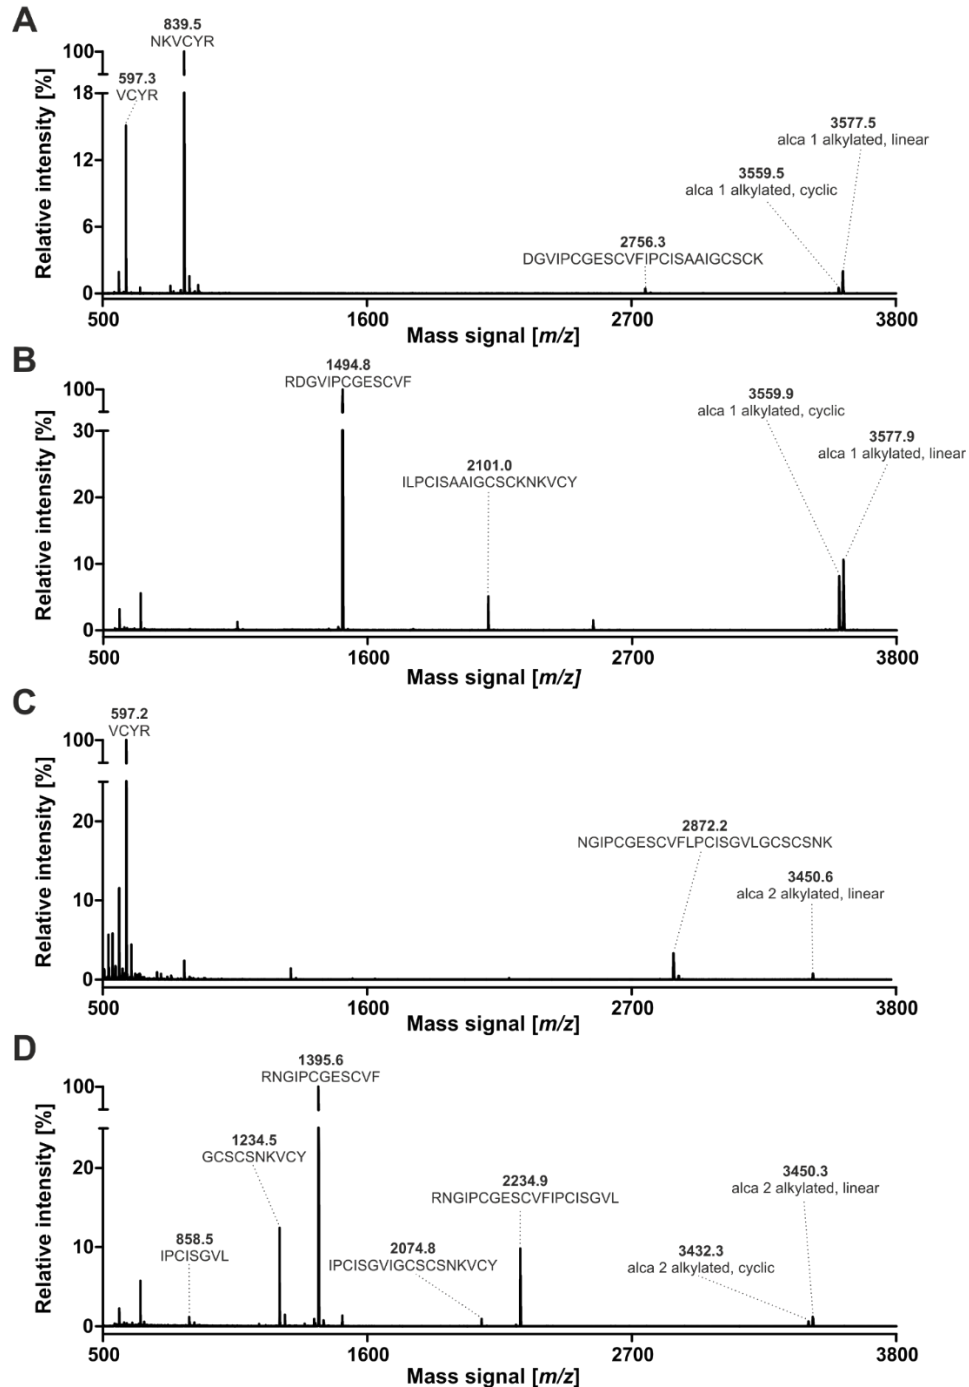

Supplementary Figure S7. Tryptic and chymotryptic fragment peptide analysis for alca 1 and alca 2. MALDI-MS analysis of tryptic and chymotryptic digests of alca 1 (A, B) and alca 2 (C, D) are shown with the observed masses and the assigned amino acid sequences of the fragments. The alkylated, cyclic peptides and the respective linear peptides are labelled in the spectra where these peaks were visible. The cyclic peptide sequences are cyclo-GVIPCGESCVFIPCISAAIGCSCKNKVCYRD (alca 1) and cyclo-GIPCGESCVFIPCISGVLGCSCSNKVCYRN (alca 2). Tryptic digest was performed for 2.5 h at 37°C, chymotryptic fragments were measured after 1.5 h digestion time at RT. Spectra are shown in the mass range of  $m/z$  500-3800.

A

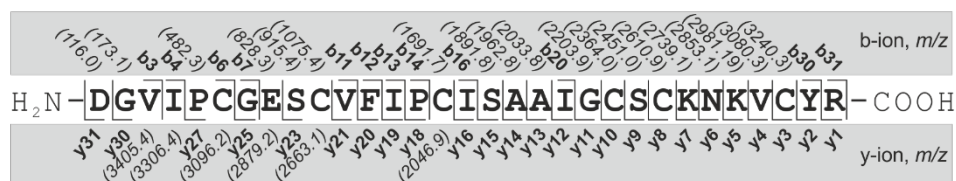

B

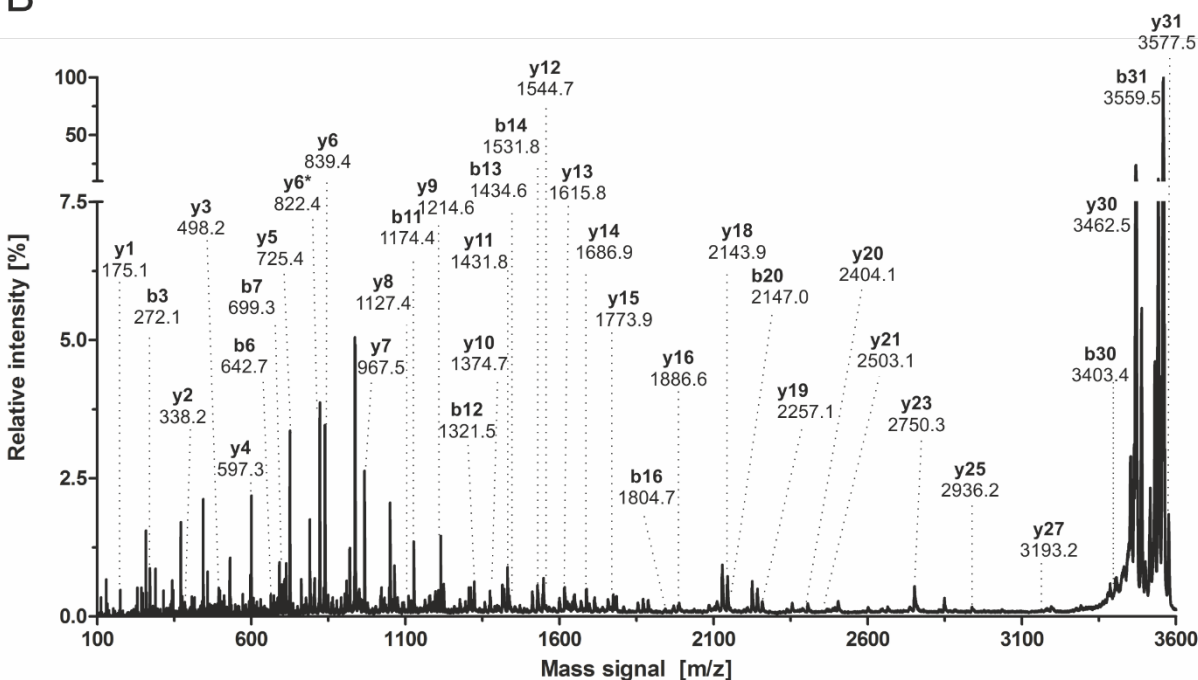

Supplementary Figure S8. Alca 1 fragmentation spectrum of tryptic digest. Annotation of tryptic full length precursor m/z 3577.5 of alca 1 (A). The annotated sequence is shown on the top. The b- and y-ions are assigned with corresponding mass signals. The annotated fragment ion spectrum provided (B). The asterisk indicates loss of ammonia (-17 Da).

A

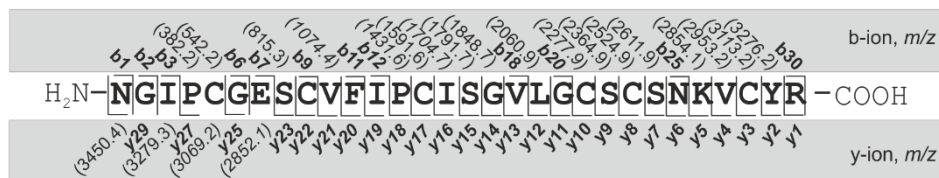

B

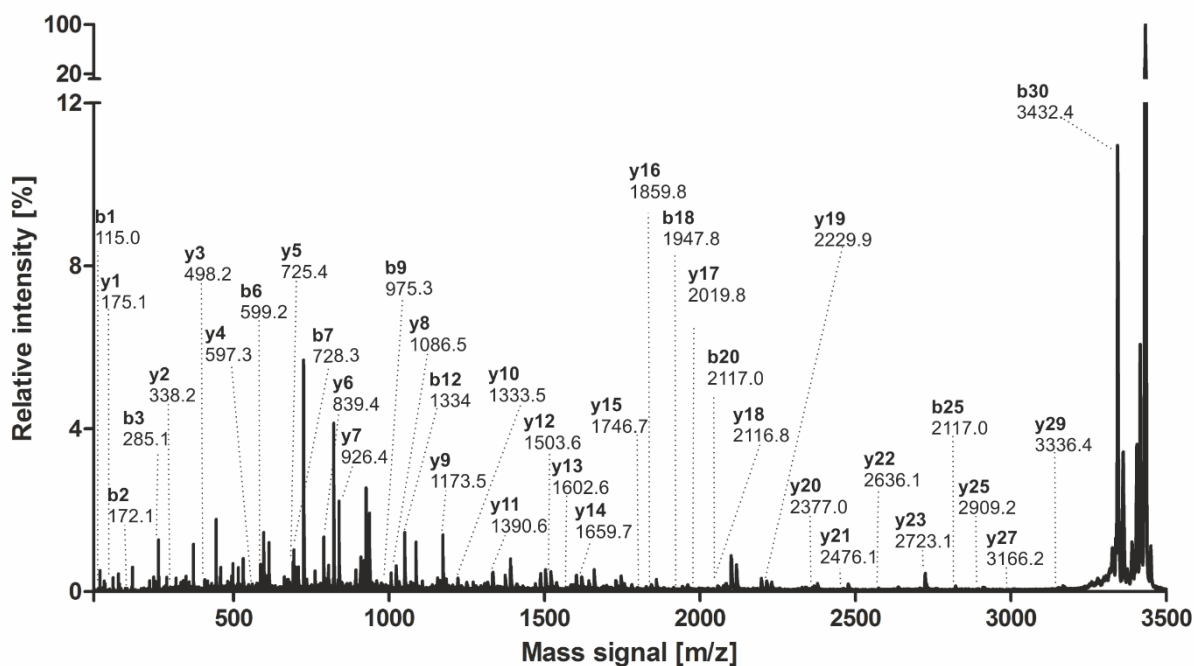

Supplementary Figure S9. Alca 2 fragmentation spectrum of tryptic digest Annotation of tryptic full length precursor m/z 3540.6 of alca 2 (A). The annotated sequence is shown on the top. The b- and y-ions are assigned with corresponding mass signals. The annotated fragment ion spectrum provided (B).

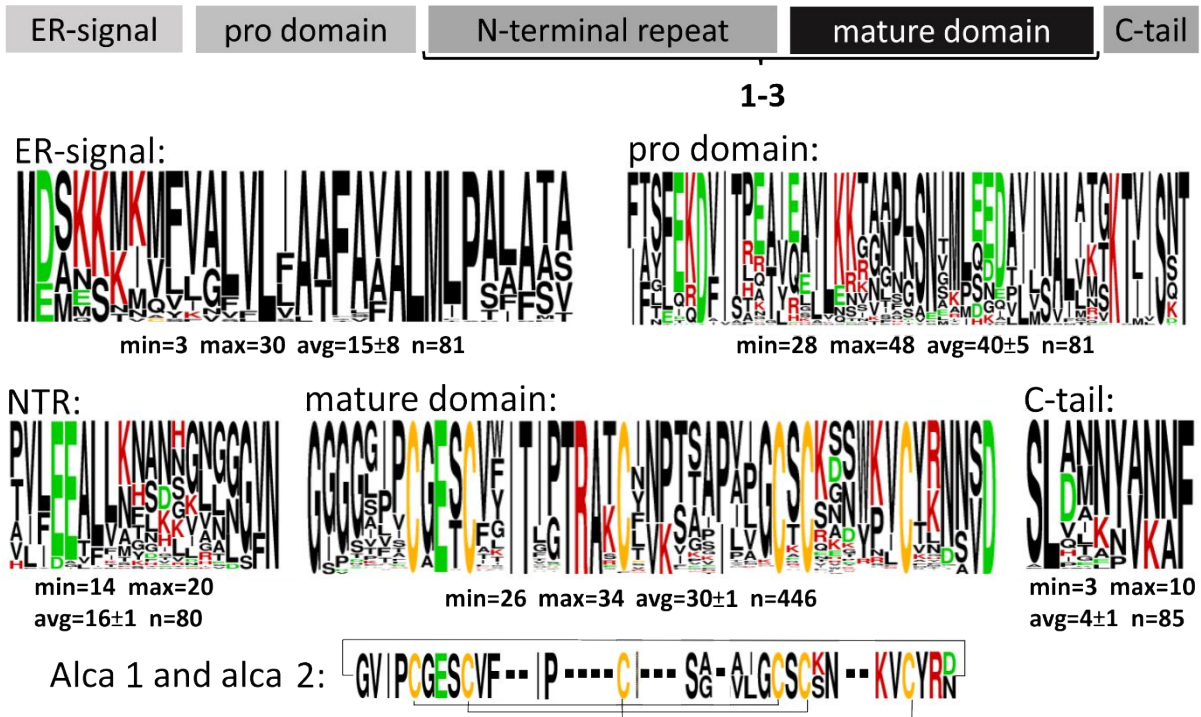

Supplementary Figure S10. Precursor analysis of violaceous cyclotides genes. Cyclotides are synthesized from precursor proteins typically consisting of an endoplasmic reticulum signal (ER-signal), a pro domain, a N-terminal repeat (NTR), a mature domain and a C-terminal tail (C-tail). The N-terminal repeat and the mature domain can be repeated up to three times. Annotated precursor proteins from Violaceae species were retrieved from Cybase and aligned with Clustal Omega. From all regions frequency plots were made with Weblogo and the minimum (min), maximum (max) and average (avg) length of each region  $\pm$  standard deviation was calculated using custom Python scripts. Untypical sequences have been excluded from the analysis and the number (n) of used sequences is given. The frequency plot of alca 1 and alca 2 was aligned to the mature domain. Gaps (-) were introduced to maximize the alignment. Amino acids positively charged at pH7 (H, K, R) are coloured in red, amino acids negatively charged at pH7 (D, E) are coloured in green and cysteines (C) are shown in orange. The cyclic cystine knot topology is indicated in the frequency plot of alca 1 and alca 2.

Table S1. Peptidomic analysis of Allexis batangae peptide enriched extracts.

| Native mass signal (m/z) <sup>1</sup> | Mass signal of cysteine reduced sample (m/z) <sup>2</sup> | Mass signal of cysteine carbamdiomethylated sample (m/z) <sup>3</sup> | Mass signal of EndoGluc processed (m/z) <sup>4</sup> |
|---------------------------------------|-----------------------------------------------------------|-----------------------------------------------------------------------|------------------------------------------------------|
| 2948.2                                | 2954.1                                                    | 3296.3                                                                | 3314.3                                               |
| 2962.3                                | 2968.0                                                    | 3310.2                                                                | 3328.1                                               |
| 3057.2                                | 3063.5                                                    | 3405.1                                                                | 3423.4                                               |
| 3067.2                                | 3073.3                                                    | 3415.3                                                                | 3433.3                                               |
| 3084.1                                | 3090.2                                                    | 3432.3                                                                | 3450.2                                               |
| 3111.2                                | 3117.3                                                    | 3459.4                                                                | 3477.4                                               |
| 3193.1                                | 3199.3                                                    | 3541.5                                                                | 3559.4                                               |
| 3210.3                                | 3216.1                                                    | 3558.4                                                                | 3576.5                                               |
| 3254.4                                | 3260.1                                                    | 3602.4                                                                | 3620.5                                               |
| 3268.2                                | 3274.2                                                    | 3616.5                                                                | 3634.4                                               |
| 3372.3                                | 3378.2                                                    | 3720.5                                                                | 3738.5                                               |
| 3398.3                                | 3404.3                                                    | 3746.5                                                                | 3764.3                                               |

1 monoisotopic mass signals are shown

2 Full cysteine reduction with DTT obtains a mass shift of +1.0079 Da per residue

3 Carbamidomethylation with IAA obtains a mass shift of +348.1757 Da

4 Proteolytic cleavage of endoprotease GluC provides a mass shift of +18 Da corresponding to a conversion of a cyclic to a linear fragment peptide

Table S2. Peptidomic analysis of Allexis obanensis peptide enriched extracts.

| Native mass signal (m/z) <sup>1</sup> | Mass signal of cysteine reduced sample (m/z) <sup>2</sup> | Mass signal of cysteine carbamdiomethylated sample (m/z) <sup>3</sup> | Mass signal of EndoGluc processed (m/z) <sup>4</sup> |
|---------------------------------------|-----------------------------------------------------------|-----------------------------------------------------------------------|------------------------------------------------------|
| 3067.2                                | 3073.4                                                    | 3415.0                                                                | 3433.3                                               |
| 3084.2                                | 3090.0                                                    | 3432.3                                                                | 3450.2                                               |
| 3097.4                                | 3103.0                                                    | 3445.3                                                                | 3463.1                                               |
| 3111.4                                | 3117.1                                                    | 3459.1                                                                | 3477.0                                               |
| 3182.3                                | 3188.4                                                    | 3530.1                                                                | 3548.0                                               |
| 3193.4                                | 3199.4                                                    | 3541.2                                                                | 3559.6                                               |
| 3210.3                                | 3216.0                                                    | 3558.2                                                                | 3576.4                                               |
| 3254.2                                | 3260.1                                                    | 3602.1                                                                | 3620.0                                               |
| 3268.2                                | 3274.1                                                    | 3616.5                                                                | 3634.2                                               |
| 3372.1                                | 3378.2                                                    | 3720.5                                                                | 3738.6                                               |

1 monoisotopic mass signals are shown

2 Full cysteine reduction with DTT obtains a mass shift of +1.0079 Da per residue

3 Carbamidomethylation with IAA obtains a mass shift of +348.1757 Da

4 Proteolytic cleavage of endoprotease GluC provides a mass shift of +18 Da corresponding to a conversion of a cyclic to a linear fragment peptide

Table S3. Peptidomic analysis of Allexis zygomorpha peptide enriched extract.

| Native mass signal<br>(m/z) <sup>1</sup> | Mass signal of cysteine<br>reduced sample (m/z) <sup>2</sup> | Mass signal of cysteine<br>carbamdiomethylated<br>sample (m/z) <sup>3</sup> | Mass signal of EndoGluc<br>processed (m/z) <sup>4</sup> |
|------------------------------------------|--------------------------------------------------------------|-----------------------------------------------------------------------------|---------------------------------------------------------|
| 2948.2                                   | 2954.3                                                       | 3296.1                                                                      | 3314.1                                                  |
| 2962.1                                   | 2968.2                                                       | 3310.2                                                                      | 3328.2                                                  |
| 3067.3                                   | 3073.1                                                       | 3415.3                                                                      | 3433.3                                                  |
| 3084.2                                   | 3090.1                                                       | 3432.4                                                                      | 3450.3                                                  |
| 3097.0                                   | 3103.3                                                       | 3445.1                                                                      | 3463.4                                                  |
| 3111.1                                   | 3117.0                                                       | 3459.1                                                                      | 3477.4                                                  |
| 3182.1                                   | 3188.0                                                       | 3530.2                                                                      | 3548.5                                                  |
| 3193.2                                   | 3199.0                                                       | 3541.4                                                                      | 3559.5                                                  |
| 3210.4                                   | 3216.1                                                       | 3558.1                                                                      | 3576.5                                                  |
| 3228.1                                   | 3234.2                                                       | 3576.2                                                                      | 3594.3                                                  |
| 3254.1                                   | 3260.2                                                       | 3602.4                                                                      | 3620.5                                                  |
| 3268.2                                   | 3274.2                                                       | 3616.4                                                                      | 3634.2                                                  |
| 3316.3                                   | 3322.5                                                       | 3664.4                                                                      | 3682.1                                                  |
| 3355.2                                   | 3361.4                                                       | 3703.0                                                                      | 3721.5                                                  |
| 3372.0                                   | 3378.1                                                       | 3720.1                                                                      | 3738.6                                                  |
| 3398.3                                   | 3404.3                                                       | 3746.5                                                                      | 3764.5                                                  |

1 monoisotopic mass signals are shown

2 Full cysteine reduction with DTT obtains a mass shift of +1.0079 Da per residue

3 Carbamidomethylation with IAA obtains a mass shift of +348.1757 Da

4 Proteolytic cleavage of endoprotease GluC provides a mass shift of +18 Da corresponding to a conversion of a cyclic to a linear fragment peptide

Table S4. High sensitivity amino acid analysis of alca 1

| Amino acid**   | ug / sample* | nmol / sample | Moles (%) | Number of amino acid residues |
|----------------|--------------|---------------|-----------|-------------------------------|
| Serine         | 24.4         | 281           | 11.3      | 3                             |
| Arginine       | 16.6         | 107           | 4.3       | 1                             |
| Glycine        | 17.9         | 314           | 12.6      | 3                             |
| Aspartic acid# | 23.8         | 206           | 8.3       | 2                             |
| Glutamic acid# | 13.9         | 107           | 4.3       | 1                             |
| Alanine        | 13.9         | 196           | 7.9       | 2                             |
| Proline        | 20.5         | 211           | 8.5       | 2                             |
| Lysine         | 24.8         | 193           | 7.8       | 2                             |
| Tyrosine       | 16.8         | 103           | 4.1       | 1                             |
| Valine         | 28.2         | 284           | 11.4      | 3                             |
| Isoleucine     | 43.0         | 380           | 15.3      | 4                             |
| Phenylalanine  | 15.4         | 105           | 4.2       | 1                             |
| Total          | 259.1        | 2486          | 100.0     | 25                            |

\*\* cysteine and tryptophane residues were not analysed

\* calculation based on amino acid residue mass (molecular weight minus H<sub>2</sub>O), reporting limit was 0.8 µg/sample

# due to hydrolyzation Asp/Asn and Glu/Gln cannot be distinguished

Table S5. High sensitivity amino acid analysis of alca 2

| Amino Acid**   | ug / sample* | nmol / sample | Moles (%) | Number of amino acid residues |
|----------------|--------------|---------------|-----------|-------------------------------|
| Serine         | 8.20         | 94.2          | 15.1      | 4                             |
| Arginine       | 4.13         | 26.4          | 4.2       | 1                             |
| Glycine        | 5.82         | 102.1         | 16.4      | 4                             |
| Aspartic acid# | 6.09         | 52.9          | 8.5       | 2                             |
| Glutamic acid# | 3.52         | 27.3          | 4.4       | 1                             |
| Proline        | 5.17         | 53.3          | 8.6       | 2                             |
| Lysine         | 3.53         | 27.6          | 4.4       | 1                             |
| Tyrosine       | 4.29         | 26.3          | 4.2       | 1                             |
| Valine         | 8.01         | 80.8          | 13.0      | 3                             |
| Isoleucine     | 8.89         | 78.6          | 12.6      | 3                             |
| Leucine        | 2.98         | 26.3          | 4.2       | 1                             |
| Phenylalanine  | 3.97         | 27.0          | 4.3       | 1                             |
| Total          | 64.60        | 622.6         | 100.0     | 24                            |

\*\* cysteine and tryptophane residues were not analysed

\* calculation based on amino acid residue mass (molecular weight minus H<sub>2</sub>O), reporting limit was 0.4 µg/sample

# due to hydrolyzation Asp/Asn and Glu/Gln cannot be distinguished

## Supplementary Data S1: Sequence alignment of cyclotides to alca 1 and alca 2

Alignment of alca peptides to known cyclotide sequences obtained from CyBase was performed. The best 5 alignments are shown for alca 1 as well as alca 2.

### alca 1

|                   |                                        |
|-------------------|----------------------------------------|
| alca 1            | GVIPCGESCVFIPCISAAIGCSCKNKVCYRD-       |
| Cycloviolin_A     | <br>GVIPCGESCVFIPCISAAIGCSCKNKVCYR-N   |
| alca 1            | GVIPCGESCVFIPCIS-AAI-GCSCKNKVCYRD      |
| psyle_F           | <br>GVIPCGESCVFIPCI-TAA-VGCSCKNKVCYRD  |
| alca 1            | GVI-PCGESCVFIPCISAAIGCSCKNKVCYRD-      |
| cycloviolin_D     | <br>G--FPCGESCVFIPCISAAIGCSCKNKVCYR-N  |
| alca 1            | GVIPCGESCVF-IPCISAAIGCSCKNKVCYRD-      |
| cycloviolacin_O17 | <br>G-IPCGESCV-WIPCISAAIGCSCKNKVCYR-N  |
| alca 1            | GVIPCGESCVFIPCISAA--IGCSCKNKVCYRD-     |
| Cter_A            | <br>GVIPCGESCVFIPCIS--TVIGCSCKNKVCYR-N |

### alca 2

|          |                                          |
|----------|------------------------------------------|
| alca 2   | GIPCGESCVFIPCISGVL-GCSC-SNKVCYRN         |
| Hyfl_I   | <br>GIPCGESCVFIPCISGV-IGCSCKS-KVCYRN     |
| alca 2   | G-IPCGESCVFIPCISG-VLGCSCS-NKVCYRN        |
| Mra23    | <br>GVIPCGESCVFIPCIS-SVLGCSC-KNKVCYRN    |
| alca 2   | G-IPCGESCVFIPCISG-VLGCSC-SNKVCYRN        |
| Globa_B  | <br>GVIPCGESCVFIPCIS-AVLGCSCS-KVCYRN     |
| alca 2   | GIPCGESCVF-IPCISG-VLGCSCSNKVCYRN         |
| hyen_0   | <br>GIPCGESCV-WIPCIS-SVLGCSCSNKVCYRN     |
| alca 2   | GIPCGESC----VF-IPCISG-VLGCSCSNKVCYRN     |
| hyen_A Y | <br>GIPCGESCGESCV-WIPCIS-SVLGCSCSNKVCYRN |
